# Supplementary material for: The Reducing Effects of Pyrogallol-Phloroglucinol-6,6-Bieckol on High-Fat Diet-Induced Pyroptosis in Endothelial and Vascular Smooth Muscle Cells of Mice Aortas
Source: Mar Drugs. 2020 Dec 16;18(12):648. doi: 10.3390/md18120648 (PMC7766911; doi:10.3390/md18120648)
Supplement: Supplementary file 1 [file marinedrugs-18-00648-s001.pdf]

# **The reducing effects of pyrogallol-phloroglucinol-6,6-bieckol on high-fat diet-induced pyroptosis in endothelial and vascular smooth muscle cells of mice aortas**

Seyeon Oh<sup>1,#</sup>, Myeongjoo Son<sup>1,2</sup>, Chul-Hyun Park<sup>3</sup>, Ji Tae Jang<sup>4</sup>, Kuk Hui Son<sup>3,\*</sup>, Kyunghee Byun<sup>1,2,\*</sup>

<sup>1</sup> Functional Cellular Networks Laboratory, College of Medicine, Department of Medicine, Graduate School and Lee Gil Ya Cancer and Diabetes Institute, Gachon University, Incheon 21999, Republic of Korea (S.O.; seyeon8965@gmail.com)

<sup>2</sup> Department of Anatomy & Cell Biology, Gachon University College of Medicine, Incheon 21936, Republic of Korea (M.S.; mjson@gachon.ac.kr)

<sup>3</sup> Department of Thoracic and Cardiovascular Surgery, Gachon University Gil Medical Center, Gachon University, Incheon 21565, Republic of Korea

<sup>4</sup> Aqua Green Technology Co., Ltd, Smart Bldg., Jeju Science Park, Cheomdan-ro, Jeju 63309, Republic of Korea

\* Correspondence: Kuk Hui Son (dr632@gilhospital.com), Tel: +82-32-460-3666; Kyunghee Byun (khbyun1@gachon.ac.kr), Tel: +82-32-899-6511

# These authors contributed equally to this work.

## Supplementary Tables

**Supplementary table 1. List of primer for qRT-PCR**

| Gene         |         | Primers                              |
|--------------|---------|--------------------------------------|
| actb         | Forward | 5'-ACA AAG CTG TTC AGT GTC TCC A-3'  |
|              | Reverse | 5'-CTC CGT TTC CAG AAT ACA CAC A-3'  |
| Caspase1     | Forward | 5'- AGG ACA TCC TTC ATC CTC AGA A-3' |
|              | Reverse | 5'- TTC TAA AGG GCA AAA CTT GAG G-3' |
| IL-1 $\beta$ | Forward | 5'-CTT TTC GTG AAT GAG CAG ACA G-3'  |
|              | Reverse | 5'-TCA GCT TCA ATG AAA GAC CTC A-3'  |
| IL-18        | Forward | 5'-GAA GAC TCT TGC GTC AAC TTC A-3'  |
|              | Reverse | 5'-CTG ATT CCA GGT CTC CAT TTT C -3' |

**Supplementary Table 2. List of antibodies for immunohistochemistry and immunocytochemistry**

| <b>Antibody name</b> | <b>Company</b>           | <b>Dilution rate</b> |
|----------------------|--------------------------|----------------------|
| TLR4                 | Novos Biological         | 1:200                |
| NF-kB                | Cell signaling           | 1:500                |
| NLRP3                | Abcam                    | 1:200                |
| ASC                  | Santa cruz Biotechnology | 1:200                |
| ICAM-1               | Santa cruz Biotechnology | 1:250                |
| VCAM-1               | Abcam                    | 1:250                |
| ET-1                 | Abcam                    | 1:200                |

## Supplementary Figure

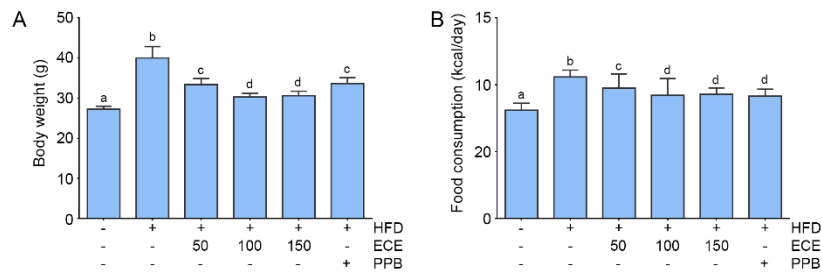

**Figure S1.** The reducing effects of ECE and PPB on body weight and food consumption in HFD -fed mice. **(A)** The graph of body weight in the HFD-fed mice. **(B)** The graph of food consumption in the HFD-fed mice. Data represent the means  $\pm$  SD. Means identified to a different letter indicate significant differences between groups. ECE, extract of *Ecklonia cava*; HFD, high-fat diet; PPB, pyrogallol-phloroglucinol-6,6-bieckol; SD, standard deviation.

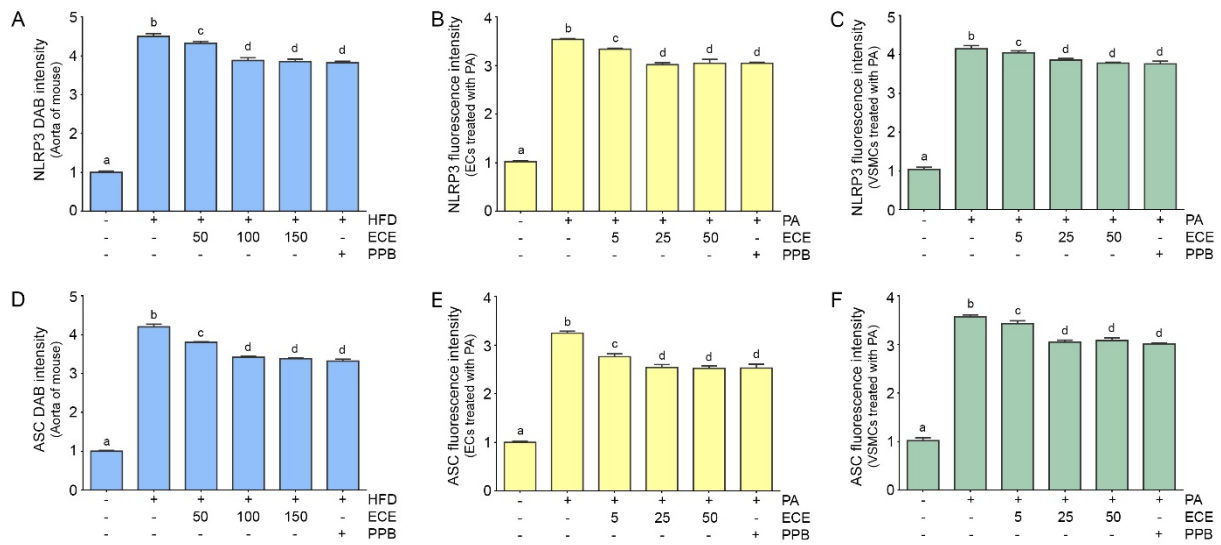

**Figure S2.** The reducing effects of ECE and PPB on expression of NLRP3 and ASC in the aorta and in the palmitate treated ECs and VSMCs. **(A)** The graph of NLRP3 protein expression level in the aorta. **(B, C)** In ECs **(B)** and VSMCs **(C)**, the graph of NLRP3 protein levels. **(D)** The graph of ASC protein expression of ASC in the aorta was increased. **(E-F)** In EC **(E)** and SMC **(F)**, the graph of ASC protein levels. Addition of ECE and PPB decreased the ASC expression levels Data represent the means  $\pm$  SD. Means identified to a different letter indicate significant differences between groups. ASC, apoptosis-associated speck-like protein; DAB, 3, 3'-diaminobenzidine; ECs, endothelial cells; ECE, extract of *Ecklonia cava*; NLRP3, NOD-like receptor pyrin domain-containing protein 3; HFD, high-fat diet; PA, palmitate acid; PPB, pyrogallol-phloroglucinol-6,6-bieckol; SD, standard deviation; VSMCs, vascular smooth muscle cells.
